# Supplementary material
Source: publisher figshare collection journal article supplement (https://frontiersin.figshare.com/ndownloader/files/35187112)
Supplement: Supplementary file [file 35187112]

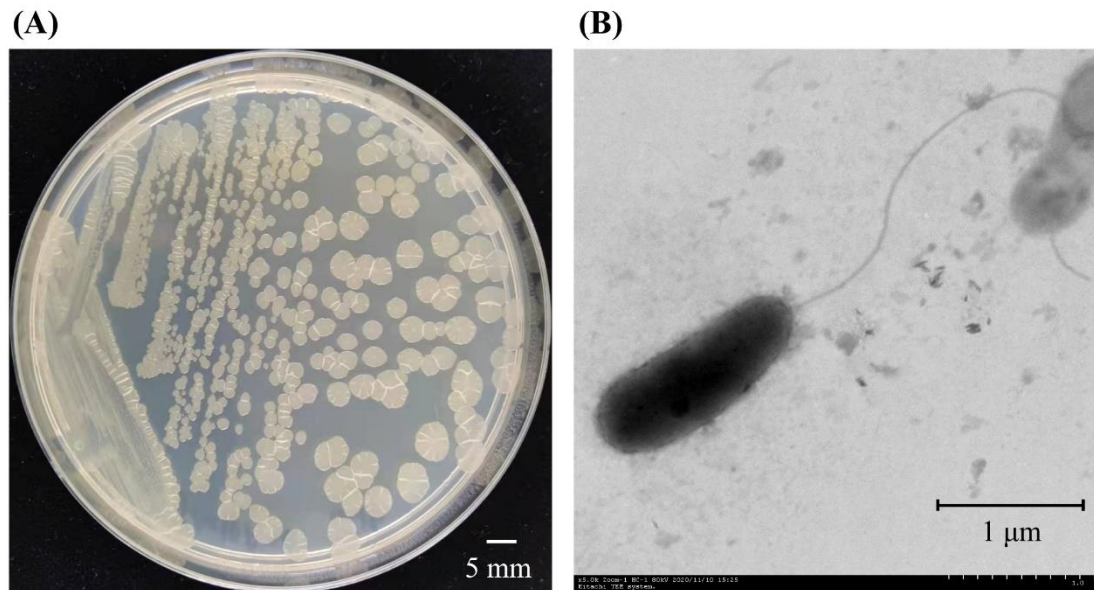

Figure 2 Colonies and cell morphology of strain JM10B5a<sup>T</sup> cultured on NA medium at 30°C for 48 h.
